# Supplementary material for: Validation of the ONKOTEV Risk Prediction Model for Venous Thromboembolism in Outpatients With Cancer
Source: PubMed Central journal article supplement (PMC9936336; doi:10.1001/jamanetworkopen.2023.0010), 2023-02-16
Supplement: jamanetwopen-e230010-s002.pdf [file jamanetwopen-e230010-s002.pdf]

## Data Sharing Statement

Cella. Validation of the ONKOTEV Risk Prediction Model for Venous Thromboembolism in Outpatients With Cancer. *JAMA Netw Open*. Published February 16, 2023.  
doi:10.1001/jamanetworkopen.2023.0010

### Data

**Data available:** No

### Additional Information

**Explanation for why data not available:** Data presented in this study are available on request from the corresponding authors.
